# Supplementary material for: Valorization of nopal wastes to produce quantum dots: optimizing synthesis and exploring in smart textile applications
Source: Frontiers journal article supplement (doi:10.3389/fmats.2024.1478418), 2024-10-16
Supplement: Data_Sheet_1.docx [file Data_Sheet_1.docx]

**Supporting Information**

**Valorization of Nopal Wastes to Produce Quantum Dots: Optimizing Synthesis and Exploring in Smart Textile Applications**

Jesús Baltazar Mosqueda-Prado1, Esteban Pinillos-Bernal2, Valentina Ospina-Montoya3, Mauricio Vásquez-Rendón2, Angélica Forgionny3, and Nancy Acelas3*

1 Ingeniería en Nanotecnología, Universidad de la Ciénega del Estado de Michoacán de Ocampo, Av. Universidad Sur 3000, Lomas de Universidad, 59103 Sahuayo de Morelos, Mich., México

2 Grupo de Investigación en Diseño – TRIADA, Facultad de Diseño, Universidad de Medellín, Carrera 87 No. 30-65, Medellín, 050026, Colombia

3Grupo de Investigación Materiales con Impacto (Mat&mpac), Facultad de Ciencias Básicas, Universidad de Medellín, Carrera 87 No. 30-65, Medellín, 050026, Colombia

*** Correspondence:**Corresponding Author
nyacelas@udemedellin.edu.co

**
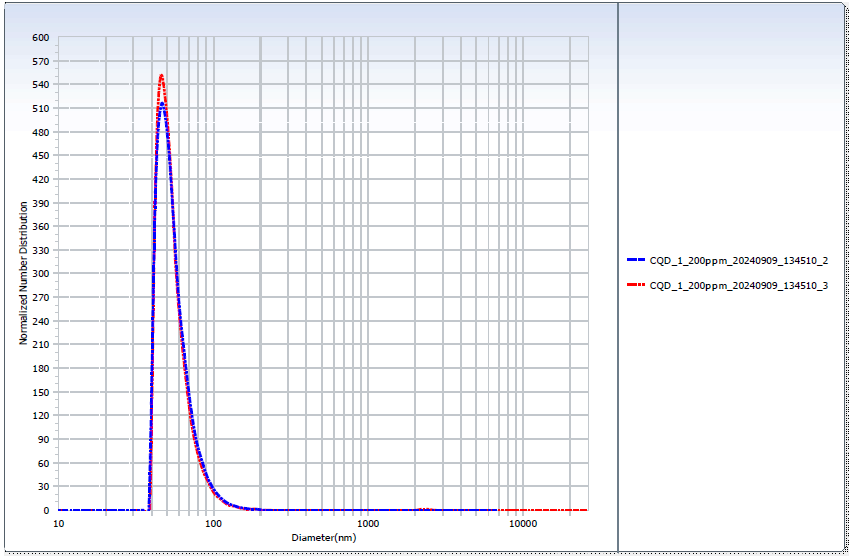

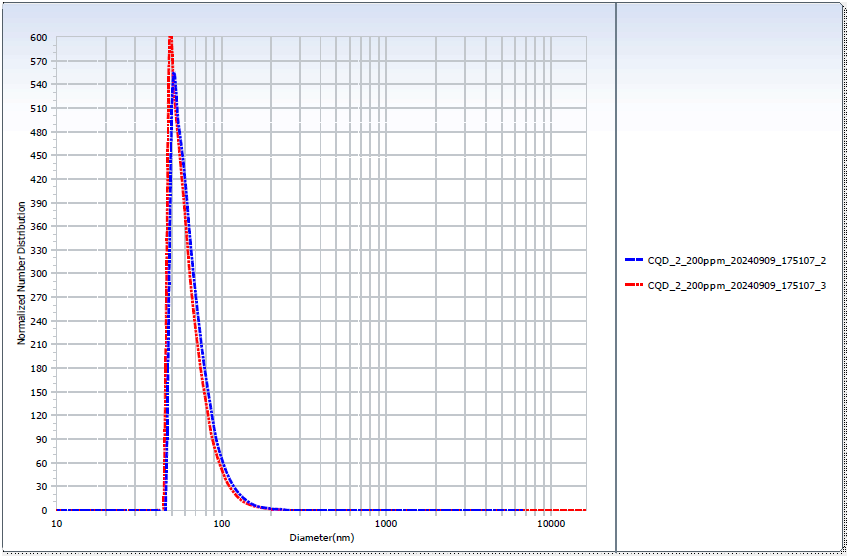
**

**
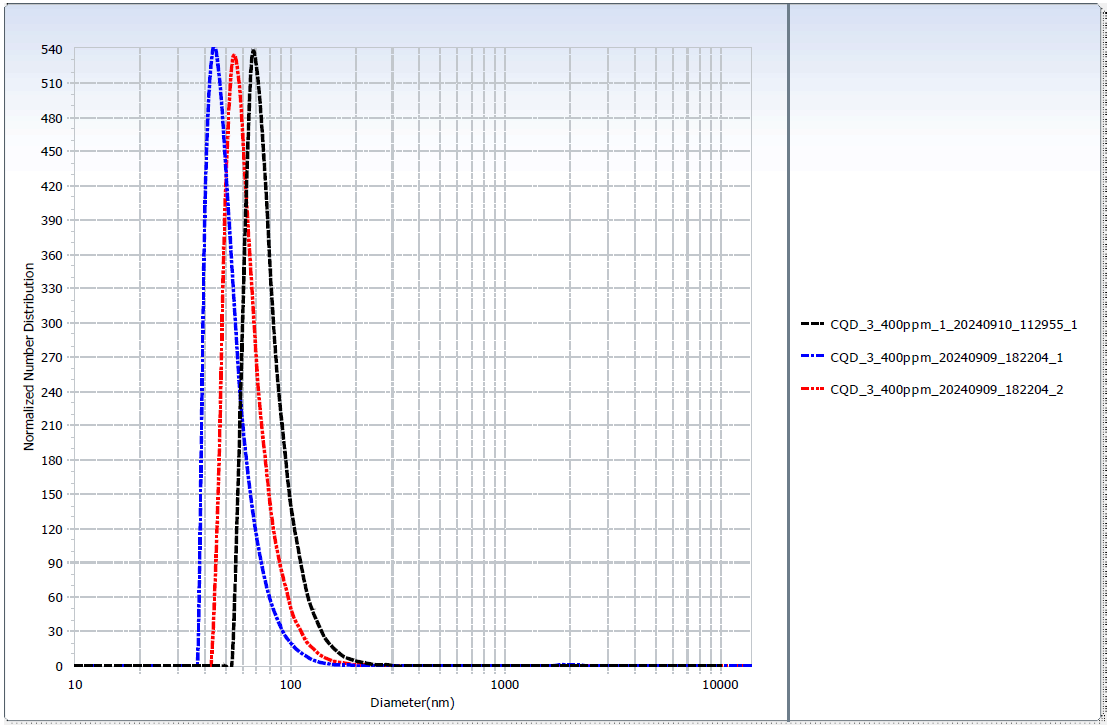

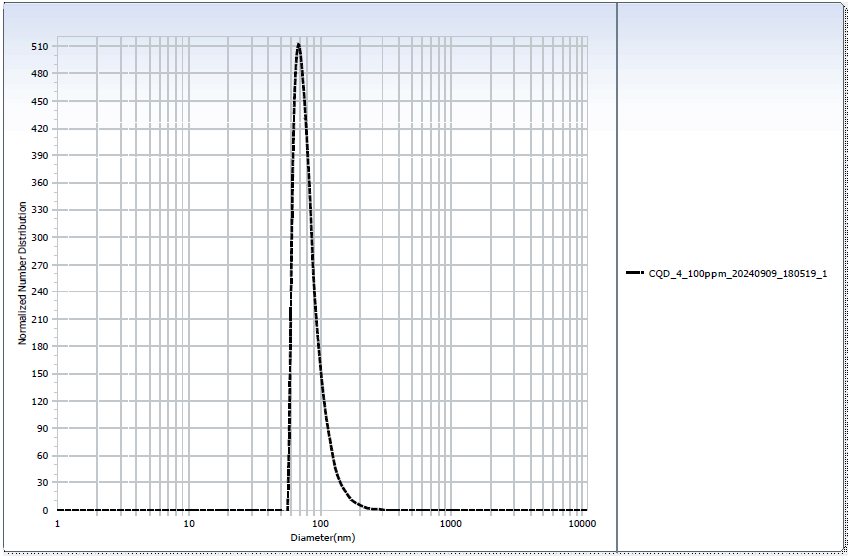
**

**
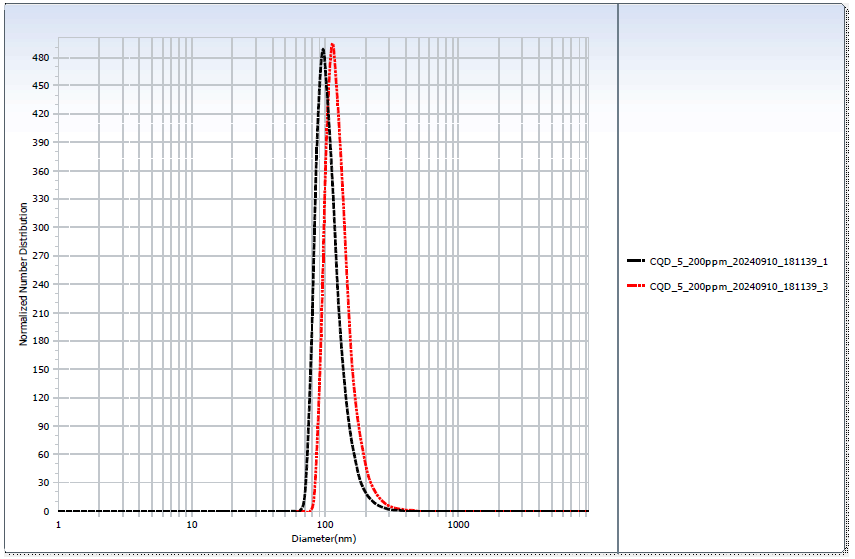
**

Figure S1. DLS analysis to different concentrations of CQDs in distilled water.
